# Supplementary material
Source: Elsevier journal article supplement (https://www.sciencedirect.com/science/article/pii/S234119291930099X)
Supplement: mmc1 [file S234119291930099X:mmc1.pdf]

**ANNEX 2**

| Cause                                                                                                                                                                                                                                                                                                                                                                                      | Indication                                                                        | Fluid balance               | RENAL (KADIGO) | SOFA CV | SOFA RESP                    | ELWI (PICCO) | B LINES | ECHO-CARDIO                 |
|--------------------------------------------------------------------------------------------------------------------------------------------------------------------------------------------------------------------------------------------------------------------------------------------------------------------------------------------------------------------------------------------|-----------------------------------------------------------------------------------|-----------------------------|----------------|---------|------------------------------|--------------|---------|-----------------------------|
| <b>SEPSIS</b><br><br><b>OR</b><br><br><b>ISCHEMIA-REPERFUSION INJURY (IRI)</b><br><br>(each indication has to be read from left to right on the same level).                                                                                                                                                                                                                               | <b>RENAL</b><br>(one of)                                                          | not controlled by diuretics | KADIGO 3       |         |                              |              |         |                             |
|                                                                                                                                                                                                                                                                                                                                                                                            |                                                                                   |                             | KADIGO 2       | 2       | ≥2 (>24h, reassess SOFA/12h) |              |         |                             |
|                                                                                                                                                                                                                                                                                                                                                                                            |                                                                                   |                             | KADIGO1        | ≥3      | ≥2 despite recruiting        |              |         |                             |
|                                                                                                                                                                                                                                                                                                                                                                                            |                                                                                   |                             |                |         |                              |              | yes     |                             |
|                                                                                                                                                                                                                                                                                                                                                                                            |                                                                                   |                             |                |         |                              | >13          |         |                             |
|                                                                                                                                                                                                                                                                                                                                                                                            | <b>EXTRA-RENAL</b><br>(if all variables from left to right are at the same level) | positive                    |                |         | ≥3 despite recruiting        |              |         |                             |
|                                                                                                                                                                                                                                                                                                                                                                                            |                                                                                   |                             |                | ≥2      | ≥2 despite recruiting        |              |         | EF <35% with no other cause |
|                                                                                                                                                                                                                                                                                                                                                                                            |                                                                                   |                             |                |         |                              |              | yes     |                             |
| <b>IDEM</b><br><b>+ SHOCK =</b><br>SOFA Cardiovascular 3<br>(NORA ≤0.1 mcg · kg <sup>-1</sup> · min <sup>-1</sup> )<br>+ High Lactate<br><b>Recommendations:</b><br>1- Define whether there is shock.<br>2- Yellow boxes: indications that require attention for AKI. Orange boxes: indications that do not.<br><br>(each indication has to be read from left to right on the same level). | <b>RENAL</b><br>(one of)                                                          | not controlled by diuretics | KADIGO 3       |         |                              |              |         |                             |
|                                                                                                                                                                                                                                                                                                                                                                                            |                                                                                   |                             | KADIGO 1       |         | ≥2 despite recruiting        |              |         |                             |
|                                                                                                                                                                                                                                                                                                                                                                                            |                                                                                   |                             |                |         |                              |              | yes     |                             |
|                                                                                                                                                                                                                                                                                                                                                                                            |                                                                                   |                             |                |         |                              | >13          |         |                             |
|                                                                                                                                                                                                                                                                                                                                                                                            |                                                                                   | positive                    | KADIGO 1       | 4       |                              |              |         |                             |
|                                                                                                                                                                                                                                                                                                                                                                                            | <b>EXTRA-RENAL</b><br>(if all variables from left to right are at the same level) | positive                    |                |         | ≥3 despite recruiting        |              |         |                             |
|                                                                                                                                                                                                                                                                                                                                                                                            |                                                                                   |                             |                |         | ≥2 despite recruiting        |              |         |                             |
|                                                                                                                                                                                                                                                                                                                                                                                            |                                                                                   |                             |                |         |                              |              | yes     | EF <35% with no other cause |
|                                                                                                                                                                                                                                                                                                                                                                                            |                                                                                   |                             |                |         |                              | >13          |         |                             |
|                                                                                                                                                                                                                                                                                                                                                                                            |                                                                                   |                             |                |         |                              |              |         |                             |

**Indications for CONVEHY in the surgical critical care unit.** The table should be read from left to right, establishing the situation that is met in the case of renal indications (one of the two conditions) and all the criteria in the case of extra-renal indications (described in the same line): KADIGO = Kidney Disease: Improving Global Outcomes classification of acute kidney injury; SOFA = Sequential Organ Failure Assessment score of organic dysfunction by device; ELWI = Extra Lung Water Index; B LINES = in lung echography, presence of B lines that indicate the presence of interstitial water; PICCO = transpulmonary thermodilution with the PiCCO® system; ECHO-CARDIO = echocardiography performed by anaesthesiologists and/or cardiologists as appropriate; NORA = noradrenaline; EF = ejection fraction. This table is under permanent review after analysing each case treated and the outcomes.
